# Supplementary material for: An enzyme-mediated in situ hydrogel based on polyaspartamide derivatives for localized drug delivery and 3D scaffolds
Source: Royal Society of Chemistry journal article supplement (doi:10.1039/c6ra18479k), 2016-01-01
Supplement: c6ra18479k1.pdf [file c6ra18479k1.pdf]

## Supporting Information

### An enzyme-mediated in situ hydrogel based on polyaspartamide derivatives for localized drug delivery and 3D scaffolds

Xu Cheng, Jia Liu, Lei Wang, Ruoli Wang, Zhilan Liu\*, Renxi Zhuo

Correspondence author: Zhilan Liu (E-mail address: [liuzl@whu.edu.cn](mailto:liuzl@whu.edu.cn))

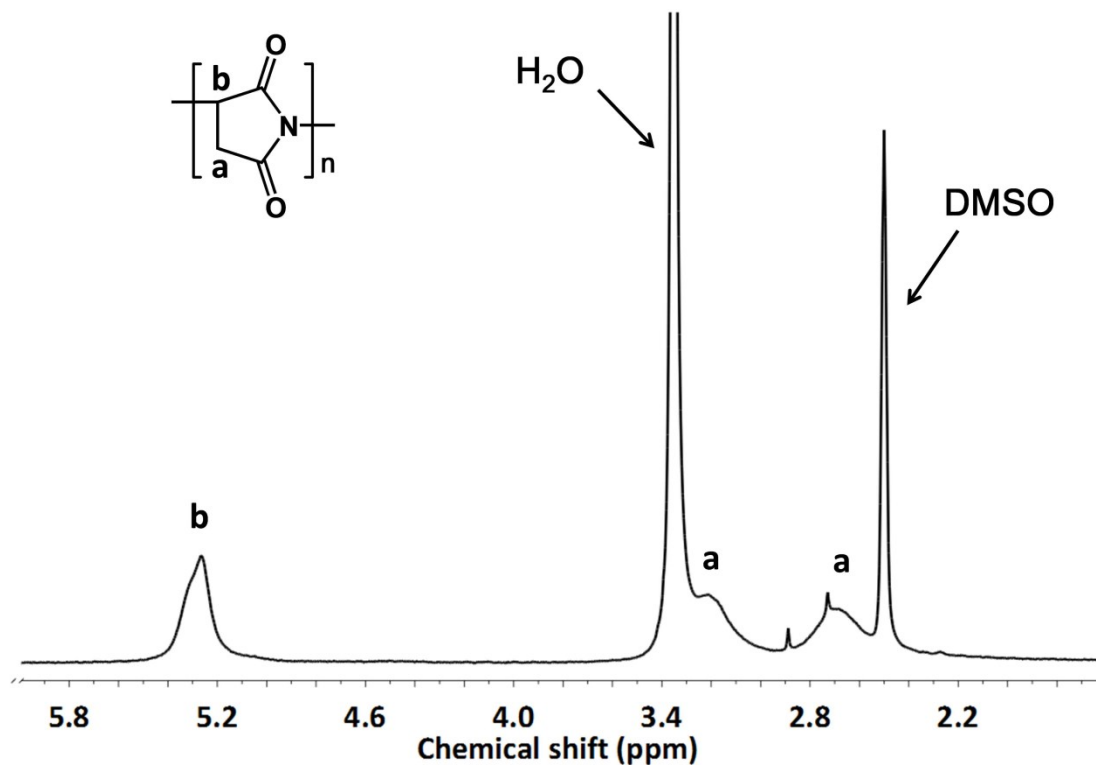

Fig S1 <sup>1</sup>H NMR spectrum of PSI in DMSO-d<sub>6</sub>

Table S1 Formulas of Hydrogels

| sample    | PASP-TA/AP (wt%) | H <sub>2</sub> O <sub>2</sub> (mM) | HRP (mg/mL) |
|-----------|------------------|------------------------------------|-------------|
| Gel 1-1-1 | 4.1              | 4.41                               | 0.003       |
| Gel 1-1-2 | 4.1              | 4.41                               | 0.016       |
| Gel 1-1-3 | 4.1              | 4.41                               | 0.032       |
| Gel 1-1-4 | 4.1              | 4.41                               | 0.048       |
| Gel 1-1-5 | 4.1              | 4.41                               | 0.064       |
| Gel 1-1-6 | 4.1              | 4.41                               | 0.080       |
| Gel 1-1-7 | 4.1              | 4.41                               | 0.096       |
| Gel 1-2-1 | 4.1              | 29.41                              | 0.016       |
| Gel 1-2-2 | 4.1              | 29.41                              | 0.032       |
| Gel 1-2-3 | 4.1              | 29.41                              | 0.048       |
| Gel 1-2-4 | 4.1              | 29.41                              | 0.064       |
| Gel 1-2-5 | 4.1              | 29.41                              | 0.080       |
| Gel 1-2-6 | 4.1              | 29.41                              | 0.096       |
| Gel 1-3-1 | 4.1              | 58.82                              | 0.016       |

|           |      |        |       |
|-----------|------|--------|-------|
| Gel 1-3-2 | 4.1  | 58.82  | 0.032 |
| Gel 1-3-3 | 4.1  | 58.82  | 0.048 |
| Gel 1-3-4 | 4.1  | 58.82  | 0.064 |
| Gel 1-3-5 | 4.1  | 58.82  | 0.080 |
| Gel 1-3-6 | 4.1  | 58.82  | 0.096 |
| Gel 1-4-1 | 4.1  | 88.23  | 0.032 |
| Gel 1-4-2 | 4.1  | 88.23  | 0.064 |
| Gel 1-4-3 | 4.1  | 88.23  | 0.096 |
| Gel 1-5-1 | 4.1  | 141.11 | 0.064 |
| Gel 2-1-1 | 16.7 | 29.41  | 0.032 |
| Gel 2-2-1 | 16.7 | 58.82  | 0.048 |
| Gel 2-2-2 | 16.7 | 58.82  | 0.064 |
| Gel 2-2-3 | 16.7 | 58.82  | 0.080 |
| Gel 2-2-4 | 16.7 | 58.82  | 0.096 |
| Gel 2-3-1 | 16.7 | 88.23  | 0.064 |
| Gel 2-4-1 | 16.7 | 141.11 | 0.016 |
| Gel 2-4-2 | 16.7 | 141.11 | 0.032 |
| Gel 2-4-3 | 16.7 | 141.11 | 0.064 |
